# Supplementary material for: Exploring the value of hybrid capture-based next-generation sequencing technology in the suspected diagnosis of bloodstream infections
Source: PeerJ. 2024 Nov 8;12:e18471. doi: 10.7717/peerj.18471 (PMC11552491; doi:10.7717/peerj.18471)
Supplement: Supplemental Information 1 [file peerj-12-18471-s001.xlsx]

## Sheet: sheet 1
Sample ID	Gender	Age	Time-consuming to report positive blood cultures (h)	Total time for probe capture sequencing	WBC	RBC	Hb	PLT	NE%	L%	PTC	IL-6	CRP	BSI	Types of pathogens in blood culture	Types of pathogens in plasma capture sequencing	Types of pathogens in WBC capture sequencing	Blood culture	Pathogens Identified by Plasma capture-seq/ RPM	Pathogens Identified by WBC capture-seq/ RPM	Comparison of blood culture and plasma sequencing	Comparison of blood culture and leukocyte sequencing	Total data volume of plasma sequencing	Q30 of plasma sequencing	Pathogen capture efficiency of plasma sequencing	Host ratio of plasma sequencing	Index ratio of plasma sequencing	Total data volume of WBC sequencing	Q30 of WBC sequencing	Pathogen capture efficiency of plasma sequencing	Host ratio of WBC sequencing	Index ratio of WBC sequencing	DNA concentration for plasma(ng/μL)	RNA concentration for plasma(ng/μL)	Concentration after library construction for plasma(ng/μL)	DNA concentration for WBC(ng/μL)	RNA concentration for WBC(ng/μL)	Concentration after library construction for WBC(ng/μL)
S1	Male	57	15.25	18.5	17.23	2.52	79	168	93.4	2	17.58	122.8	122.85	1	Bacteria	Bacteria and virus	Bacteria and virus	Enterococcus faecalis， Stenotrophomonas maltophilia	Enterococcus faecalis：987 Human betaherpesvirus 5：4961 Stenotrophomonas maltophilia：20 Torque teno virus：1956	Enterococcus faecalis：12 Human betaherpesvirus 5：520 Stenotrophomonas maltophilia：15 Torque teno virus：2035	both positive	both positive	459496	0.9025	0.9644	0.9616	0.0514	4973901	0.9349	0.9916	0.9676	0.0885	too low	too low	100.23	6.44	too low	85.67
S2	Female	92	12.75	18.5	16.53	1.91	53	57	93.5	3.6	40.14	313.3	238.9	1	Bacteria	Bacteria and virus	Bacteria and virus	Klebsiella pneumoniae	Klebsiella pneumoniae：18731 Human betaherpesvirus 5：323	Klebsiella pneumoniae：12140 Human betaherpesvirus 5：430	both positive	both positive	467079	0.902	0.9565	0.9304	0.048	2710046	0.9311	0.983	0.9549	0.0959	too low	too low	31.96	1.14	too low	91.63
S3	Female	84	Negative	18.5	11.38	2.34	63	62	95.3	1.3	2.77	112.6	58.94	1	Negative	Virus	Negative	Negative	Human betaherpesvirus 5：186	Negative	both negative	both negative	498567	0.9027	0.9614	0.9354	0.0574	3943121	0.9343	0.9406	0.9836	0.0774	too low	too low	22.69	4.04	too low	104.64
S4	Male	31	28	18.5	46.16	4.42	137	110	81.1	3.4	7.257	20.64	12	1	Bacteria	Virus	Virus	Bacillus flexus	Human betaherpesvirus 5：151	Human betaherpesvirus 5：11	only blood culture positive	only blood culture positive	1729624	0.8995	0.893	0.9733	0.0627	2856927	0.8839	0.8567	0.9414	0.063	1.4	too low	111.36	6.86	too low	52.85
S5	Male	69	40	18.5	1.87	3.09	101	25	72.8	21.4	88.32	5000	172.86	1	Bacteria	Bacteria	Bacteria	Pseudomonas aeruginosa Streptococcus parasanguinis	Pseudomonas aeruginosa：10685	Pseudomonas aeruginosa：698	both positive	both positive	2036400	0.934	0.8408	0.9705	0.0575	2108914	0.9268	0.8331	0.975	0.0697	6.3	too low	97.63	18.6	too low	88.46
S6	Female	27	Negative	18.5	43.99	3.18	84	51	16.3	4.1	1.116	12.2	42.2	1	Negative	Virus	Negative	Negative	Human betaherpesvirus 5：26	Negative	both negative	both negative	1647416	0.9016	0.9169	0.9498	0.086	2427165	0.8931	0.8249	0.9424	0.0942	0.15	too low		1.03	too low	93.66
S7	Male	67	Negative	18.5	8.42	3.97	88	273	66.1	17	5.39	34.2	198.8	1	Negative	Fungus	Negative	Negative	Aspergillus fumigatus：1210	Negative	only sequencing positive	both negative	619918	0.9145	0.9545	0.7552	0.068	1258869	0.9	0.9425	0.9561	0.04	0.74	too low	57.75	2.05	too low	74.32
S8	Female	84	15	18.5	19.86	2.17	60	307	83	12.6	39.326	23.86	198.94	1	Bacteria	Bacteria and virus	Bacteria and virus	Klebsiella pneumoniae	Acinetobacter baumannii：284 Klebsiella pneumoniae：23 Human betaherpesvirus 5：46 Human alphaherpesvirus 2：10	Acinetobacter baumannii： 10 Klebsiella pneumoniae： 80 Human gammaherpesvirus 4：12 Human alphaherpesvirus 2：10	both positive	both positive	619224	0.9166	0.9507	0.9788	0.0451	1278762	0.9099	0.9593	0.9644	0.0519	0.36	too low	87.64	2.43	too low	77.77
S9	Male	63	Negative	18.3	13.88	3.9	130	229	82.5	13.7	5.24	205.3	202.2	1	Negative	Bacteria and virus	Bacteria and virus	Negative	Staphylococcus aureus：658 Human gammaherpesvirus 4：84	Staphylococcus aureus：5 Human gammaherpesvirus 4：20	only sequencing positive	only sequencing positive	715676	0.9229	0.9766	0.9806	0.0569	1873666	0.9052	0.9331	0.9643	0.059	0.15	too low	110.35	4.35	too low	86.52
S10	Female	82	Negative	18.3	16.93	2.72	77	109	88.8	7.8	4.47	412.9	93	1	Negative	Virus	Virus	Negative	Human betaherpesvirus 5：3462	Human betaherpesvirus 5：14 Human gammaherpesvirus 4：51	both negative	both negative	1792978	0.9177	0.9797	0.7462	0.0563	1952404	0.9086	0.9314	0.9697	0.0495	0.65	too low	132.64	3.64	too low	143.56
S11	Female	68	Negative	18.3	9.39	3.1	102	297	85.7	6.6	0.112	35.66	60.55	1	Negative	Negative	Negative	Negative	Negative	Negative	both negative	both negative	582807	0.9264	0.8417	0.7288	0.0644	2409603	0.919	0.8802	0.9693	0.0846	0.12	too low	78.65	6.35	too low	93.65
S12	Male	73	Negative	18.3	13.15	3.85	117	155	88.1	5.9	0.482	212.6	5.9	0	Negative	Negative	Negative	Negative	Negative	Negative	both negative	both negative	1175145	0.9262	0.8673	0.9645	0.0503	2191805	0.9176	0.8157	0.9682	0.0829	0.64	too low	93.64	1.35	too low	76.53
S13	Female	95	Negative	18.3	13.63	4.05	116	14	98.3	2.2	21.53	4518	135.7	1	Negative	Bacteria and fungus	Negative	Negative	Klebsiella pneumoniae：384 Candida glabrata：251	Negative	only sequencing positive	both negative	1059934	0.9238	0.9558	0.9567	0.0587	2228863	0.9237	0.8467	0.9695	0.1061	0.54	too low	77.68	3.62	too low	73.42
S14	Male	73	Negative	18.3	9.41	3.6	108	47	90.3	3.7	2.53	38.93	3.9	0	Negative	Negative	Negative	Negative	Negative	Negative	both negative	both negative	1067542	0.9281	0.8862	0.9634	0.0756	2118236	0.9189	0.7295	0.967	0.0919	0.98	too low	81.62	1.42	too low	96.35
S15	Male	87	Negative	18.3	36.52	3.43	105	404	96.7	1.1	3.68	680.5	55.42	1	Negative	Bacteria and virus	Negative	Negative	Klebsiella pneumoniae：36 Human gammaherpesvirus 4：161	Negative	only sequencing positive	both negative	1473918	0.9293	0.9386	0.9592	0.0801	3503167	0.9214	0.7225	0.9664	0.1049	0.14	too low	90.23	2.24	too low	73.65
S16	Female	31	Negative	18.3	8.42	3.67	93	164	85.5	7.2	2.29	130.3	200.05	1	Negative	Negative	Negative	Negative	Negative	Negative	both negative	both negative	352655	0.927	0.8506	0.8245	0.0911	3384005	0.9228	0.6527	0.9671	0.1043	0.05	too low	93.64	2.31	too low	76.53
S17	Male	69	Negative	18.2	8.54	2.35	64	179	91.5	5.4	87.24	89.63	238.8	1	Negative	Negative	Negative	Negative	Negative	Negative	both negative	both negative	1493196	0.9278	0.8715	0.9591	0.0836	882356	0.9185	0.884	0.9575	0.1148	too low	too low	100.48	1.23	too low	113.25
S18	Male	73	Negative	18.2	10.49	3.44	104	212	83.3	6.8	2.485	197.3	159.49	1	Negative	Virus	Negative	Negative	Human gammaherpesvirus 4：55	Negative	both negative	both negative	2123961	0.9575	0.9363	0.9828	0.0129	3618515	0.9587	0.8682	0.9863	0.0202	0.92	too low	105.63	5.46	too low	108.36
S19	Male	82	Negative	18.2	20.9	3.21	96	248	95.1	1.7	1.65	178.9	200	1	Negative	Virus	Negative	Negative	Human gammaherpesvirus 4：24	Negative	both negative	both negative	2823592	0.9566	0.9475	0.9649	0.0118	4127940	0.9589	0.9288	0.9872	0.0177	0.21	too low	97.64	2.35	too low	110.84
S20	Male	30	Negative	18.2	6.77	6.44	133	255	65.5	22.5	5.3	1.82	7.19	1	Negative	Virus	Virus	Negative	Human betaherpesvirus 5：1379	Human betaherpesvirus 5：202	both negative	both negative	2479736	0.9564	0.9587	0.9677	0.0255	9093293	0.9582	0.9017	0.9798	0.0346	0.13	too low	53.65	3.62	too low	74.36
S21	Female	70	Negative	18.2	7.2	2.99	107	158	82.6	11.7	6.07	107.2	24.1	1	Negative	Bacteria and virus	Virus	Negative	Streptococcus pneumoniae：19 Human gammaherpesvirus 4：275	Human gammaherpesvirus 4： 17	only sequencing positive	both negative	3172217	0.9424	0.7986	0.9824	0.0654	597717	0.9672	0.8421	0.9772	0.0263	0.22	too low	102.63	1.47	too low	110.32
S22	Male	14	Negative	18.2	5.34	4.61	138	212	64.9	25.1	2.64	56.3	74.6	0	Negative	Negative	Negative	Negative	Negative	Negative	both negative	both negative	390255	0.9701	0.8672	0.9665	0.0174	787907	0.9665	0.8713	0.9732	0.0291	0.57	too low	96.54	0.98	too low	123.65
S23	Male	68	26	18.2	26.02	3.2	89	173	97.6	0.8	5.14	678.3	144.5	1	Bacteria	Bacteria and virus	Bacteria and virus	Klebsiella pneumoniae	Klebsiella pneumoniae：10187 Staphylococcus aureus：32 Pseudomonas aeruginosa：56 Human gammaherpesvirus 4：362	Klebsiella pneumoniae：5613 Staphylococcus aureus：23 Pseudomonas aeruginosa：29 Human gammaherpesvirus 4：186	both positive	both positive	1063953	0.9179	0.9563	0.9639	0.0735	1953781	0.9211	0.9526	0.9759	0.0442	too low	too low	96.46	0.63	too low	98.65
S24	Male	84	32	18.2	10.92	3.26	101	181	89.7	1.7	40.76	587.6	112.8	1	Bacteria and fungus	Bacteria，fungus and virus	Bacteria，fungus and virus	Candida albicans Streptococcus constellatus	Enterococcus faecalis：21 Streptococcus constellatus 7 Human alphaherpesvirus 1：2726 Varicella zoster virus：1017 Candida albicans: 6 Torque teno virus：782	Enterococcus faecalis：16 Streptococcus constellatus：3 Human alphaherpesvirus 1：4180 Varicella zoster virus：1728 Candida albicans: 5 Torque teno virus：429	both positive	both positive	1607054	0.9191	0.9653	0.9747	0.043	1262477	0.93	0.9756	0.9733	0.0612	2.53	0.63	96.82	7.32	2.63	89.65
S25	Female	53	Negative	18.2	11.9	3.94	110	175	78.6	17.2	1.53	1.78	21.48	0	Negative	Bacteria and virus	Virus	Negative	Rickettsia typhi：9 Human alphaherpesvirus 1：69 Human gammaherpesvirus 4：20 Torque teno virus：606	Human alphaherpesvirus 1：58 Torque teno virus：210 Human gammaherpesvirus 4：20	only sequencing positive	both negative	1371711	0.9184	0.9179	0.9822	0.0317	530210	0.9271	0.875	0.984	0.0108	0.246	too low	110.32	3.64	too low	97.63
S26	Male	69	Negative	18.4	8.38	2.39	68	264	71	12.3	1.78	60.67	60.3	1	Negative	Virus	Virus	Negative	Human gammaherpesvirus 4：3155 Torque teno virus：1104	Human gammaherpesvirus 4：329 Torque teno virus：29	both negative	both negative	568549	0.9165	0.787	0.9693	0.0369	537034	0.9175	0.7468	0.9803	0.0218	0.16	too low	132.65	1.47	too low	140.74
S27	Male	40	Negative	18.4	22.45	4.92	151	218	15.3	8.2	3.69	63.2	20.13	1	Negative	Virus	Negative	Negative	Human betaherpesvirus 6：404 Torque teno virus：106	Negative	both negative	both negative	926616	0.9372	0.6981	0.9808	0.0277	1577626	0.9326	0.7407	0.9743	0.0715	too low	too low	94.32	0.28	too low	77.63
S28	Male	62	30	18.4	18.02	3.35	102	251	88.7	6.5	1.89	64.39	53.42	1	Bacteria	Bacteria and virus	Virus	Pseudomonas aeruginosa	Pseudomonas aeruginosa：36 Human gammaherpesvirus 4：36 Hepatitis B virus：21	Human gammaherpesvirus 4：11	both positive	only blood culture positive	681031	0.9744	0.78	0.9888	0.0219	3775788	0.9316	0.9381	0.9803	0.0836	0.06	too low	98.63	0.948	too low	102.34
S29	Male	68	34	18.4	11.92	2.02	64	128	97.5	2.2	2.06	9.71	56.03	1	Bacteria	Bacteria and virus	Virus	Staphylococcus hominis	Staphylococcus epidermidis 16 Human betaherpesvirus 5：66 Human gammaherpesvirus 4：19	Human betaherpesvirus 5： 27	both positive	only blood culture positive	864469	0.9719	0.8091	0.9857	0.0316	3304389	0.9488	0.6164	0.9611	0.0462	0.87	too low	87.65	8.96	too low	120.67
S30	Male	75	17	18.4	2.62	2.37	70	67	79.3	10.2	500	84.18	148.29	1	Bacteria	Bacteria and virus	Bacteria and virus	Pseudomonas aeruginosa	Pseudomonas aeruginosa：111 Human gammaherpesvirus 4：5416 人多瘤病毒6型：48	Pseudomonas aeruginosa：32 Human gammaherpesvirus 4：165	both positive	both positive	653998	0.9725	0.8029	0.9751	0.0264	2168250	0.9304	0.9668	0.9621	0.0841	too low	too low	102.36	0.56	too low	122.65
S31	Male	99	Negative	18.4	13.02	3.37	100	139	95.8	2.2	0.182	98.26	19.27	0	Negative	Virus	Negative	Negative	Torque teno virus：25	Negative	both negative	both negative	734152	0.973	0.815	0.9844	0.0288	3191134	0.9329	0.9391	0.9782	0.0784	too low	too low	97.64	0.37	too low	114.35
S32	Female	43	37.5	18.4	18.97	2.85	71	355	91	6	3.79	160.5	196.2	1	Bacteria	Bacteria and virus	Bacteria and virus	Staphylococcus epidermidis	Human betaherpesvirus 5：417 Staphylococcus epidermidis：1061	Human betaherpesvirus 5：512 Staphylococcus epidermidis：1454	both positive	both positive	2487306	0.9506	0.8663	0.9878	0.0789	2724920	0.9525	0.8947	0.9872	0.0675	too low	too low	99.63	1.25	too low	87.63
S33	Female	78	Negative	18.4	14.57	2.35	55	43	92.9	2.4	14.66	300.6	121.45	1	Negative	Bacteria and virus	Bacteria and virus	Negative	Pseudomonas aeruginosa：3175 Enterococcus faecium：21 Human alphaherpesvirus 1：9890 Human betaherpesvirus 5：1836	Pseudomonas aeruginosa：32 Human alphaherpesvirus 1：177 Human betaherpesvirus 5：64	only sequencing positive	only sequencing positive	1453898	0.9118	0.8599	0.97	0.0948	3700492	0.9358	0.9395	0.9826	0.0776	0.74	too low	100.48	5.4	too low	132.67
S34	Female	76	21	18.6	9.21	3.65	114	131	90.6	6	39.84	4644	184.2	1	Bacteria	Bacteria and virus	Bacteria	Escherichia coli	Escherichia coli：260 Human polyomavirus：47 Human betaherpesvirus 6：20	Escherichia coli：27	both positive	both positive	2819504	0.9438	0.9084	0.9835	0.0227	3395678	0.9754	0.9106	0.988	0.0705	0.13	too low	110.64	4.92	too low	114.67
S35	Male	65	Negative	18.6	16.2	3.08	99	113	95.2	2.9	9.63	629.2	167.4	1	Negative	Bacteria，fungus and virus	Negative	Negative	Acinetobacter baumannii：74 Aspergillus fumigatus：11 Human betaherpesvirus 5：3255	Negative	only sequencing positive	both negative	840469	0.9628	0.9826	0.9844	0.0528	3878965	0.9749	0.8187	0.9844	0.0786	0.33	too low	53.67	20.6	too low	102.32
S36	Male	68	Negative	18.6	19.59	2.19	54	549	81.7	9.3	6.75	586.7	122.9	1	Negative	Bacteria and virus	Bacteria and virus	Negative	Escherichia coli：18 Bacteroides dorei：12 Klebsiella pneumoniae：10 Human betaherpesvirus 5：390	Escherichia coli：8 Human betaherpesvirus 5：27	only sequencing positive	only sequencing positive	1835144	0.9688	0.9551	0.9918	0.0803	2827607	0.9736	0.8826	0.9812	0.086	1.08	too low	100.67	3.16	too low	112.42
S37	Male	55	13	18.6	18.78	1.3	44	69	92.1	1.7	20.49	5000	404.2	1	Bacteria	Bacteria and virus	Bacteria and virus	Klebsiella pneumoniae	Klebsiella pneumoniae：234 Human gammaherpesvirus 4：116	Klebsiella pneumoniae：220 Human gammaherpesvirus 4：244	both positive	both positive	1110312	0.9698	0.9448	0.9892	0.0679	4851714	0.9736	0.8667	0.9821	0.1165	0.23	too low	47.56	1.05	too low	78.53
S38	Male	66	Negative	18.6	7.33	3.06	82	515	72.1	12.8	3.99	22.26	75.83	1	Negative	Bacteria and virus	Bacteria and virus	Negative	Pseudomonas aeruginosa：844 Human gammaherpesvirus 4：3886	Pseudomonas aeruginosa： ：23 Human gammaherpesvirus 4：440	only sequencing positive	only sequencing positive	457916	0.9383	0.9775	0.9779	0.0509	569295	0.9386	0.9581	0.9847	0.0723	0.42	too low	73.63	3.25	too low	87.65
S39	Male	55	Negative	18.6	5.03	1.97	67	145	80	14.8	1.56	90.13	178.7	1	Negative	Virus	Virus	Negative	Human gammaherpesvirus 4：573	Human gammaherpesvirus 4：580	both negative	both negative	763769	0.9385	0.9555	0.9833	0.0925	521280	0.9391	0.9463	0.9865	0.0577	0.14	too low	73.46	3.33	too low	98.65
S40	Male	60	Negative	18.6	6.27	3.68	101	111	73	22.3	2.67	2947	12.3	1	Negative	Negative	Negative	Negative	Negative	Negative	both negative	both negative	583357	0.9398	0.9315	0.9873	0.0576	563779	0.9391	0.8989	0.9862	0.0741	0.26	too low	93.65	3.65	too low	74.36
S41	Female	8	29	18.3	2.67	3.93	89	88	77.2	8.5	2.36	2.24	8.7	1	Bacteria	Bacteria	Bacteria	Staphylococcus haemolyticus	Staphylococcus epidermidis：142	Staphylococcus epidermidis：121	both positive	both positive	4961405	0.9458	0.9527	0.9861	0.0462	5000000	0.9445	0.8807	0.9886	0.057	0.34	too low	46.58	1.25	too low	74.65
S42	Female	57	Negative	18.3	9.85	4.02	124	234	65.3	25.1	1.029	6.43	0.9	0	Negative	Negative	Negative	Negative	Negative	Negative	both negative	both negative	5000000	0.9226	0.9035	0.9784	0.0049	5000000	0.9183	0.6149	0.9689	0.0021	0.06	too low	96.55	0.28	too low	105.36
S43	Male	82	Negative	18.3	1.51	2.57	70	114	35.7	52.3	1.63	4037	154	1	Negative	Bacteria and virus	Bacteria and virus	Negative	Klebsiella pneumoniae：7 Torque teno virus：647	Klebsiella pneumoniae：16 Human betaherpesvirus 7：81 Torque teno virus：881	only sequencing positive	only sequencing positive	2247109	0.9543	0.9935	0.9836	0.0853	1645220	0.9574	0.9889	0.9821	0.0636	1.02	too low	86.35	5.26	too low	96.32
S44	Male	56	Negative	18.3	13.63	2.09	63	14	88.8	12.6	76.37	223.2	309.6	1	Negative	Bacteria，fungus and virus	Fungus and virus	Negative	Pseudomonas aeruginosa：16 Pneumocystis jirovecii：18 Human polyomavirus：3237 Human betaherpesvirus 5：76 Human gammaherpesvirus 4：53	Pneumocystis jirovecii：5 Pseudomonas aeruginosa：4 Human polyomavirus：1107 Human gammaherpesvirus 4：319 Human betaherpesvirus 5：33	only sequencing positive	only sequencing positive	5000000	0.935	0.9943	0.9818	0.0246	5000000	0.9366	0.9783	0.9833	0.0229	0.74	0.26	63.56	9.24	2.01	96.35
S45	Female	80	Negative	18.3	10.82	3.9	120	237	86.3	9.34	6.73	43.2	1.02	1	Negative	Virus	Virus	Negative	Human alphaherpesvirus 1：4468	Human alphaherpesvirus 1：4459	both negative	both negative	5000000	0.9363	0.9936	0.9847	0.0193	5000000	0.9381	0.9915	0.9833	0.0186	0.32	too low	96.85	6.35	too low	87.65
S46	Female	6	Negative	18.3	20.72	3.78	103	30.2	72.7	18.4	12.9	72.29	81.48	1	Negative	Bacteria and virus	Bacteria and virus	Negative	Mycoplasma pneumoniae：6985 Human gammaherpesvirus 4：374	Mycoplasma pneumoniae：73 Human gammaherpesvirus 4：12	only sequencing positive	only sequencing positive	1617208	0.9233	0.9932	0.9782	0.041	3021640	0.9232	0.6784	0.9753	0.0929	0.16	too low	89.54	3.87	too low	110.32
S47	Male	43	22.3333	18.3	10.23	1.73	51	78	89.9	7.2	13.07	181.6	87.81	1	Bacteria	Bacteria，fungus and virus	Bacteria，fungus and virus	Klebsiella pneumoniae Enterococcus faecium	Klebsiella pneumoniae：7705 Pseudomonas aeruginosa：7581 Acinetobacter baumannii：861 Burkholderia cenocepacia：222 Aspergillus niger：767 Human betaherpesvirus 5：5359 Torque teno virus：198	Klebsiella pneumoniae：6377 Pseudomonas aeruginosa：4891 Acinetobacter baumannii：634 Burkholderia cenocepacia：105 Aspergillus niger：280 Human betaherpesvirus 5：5101 Torque teno virus：256	both positive	both positive	1360192	0.9687	0.9848	0.9643	0.0611	1486570	0.9647	0.984	0.9684	0.058	0.65	0.36	166.32	12.35	4.52	170.84
S48	Female	39	Negative	18.3	4.01	3.4	74	30	58.2	33.9	2.43	386.5	10.22	1	Negative	Fungus and virus	Fungus and virus	Negative	Candida parapsilosis：12 Human gammaherpesvirus 4：192174	Candida parapsilosis：7 Human gammaherpesvirus 4：173463	only sequencing positive	only sequencing positive	2397984	0.9345	0.9995	0.7917	0.0872	3891722	0.9382	0.9989	0.8073	0.0953	1.23	too low	86.23	7.46	1.01	110.53
S49	Male	43	Negative	18.5	8.42	1.93	56	79	86.1	7.7	1.42	74.71	120.58	1	Negative	Bacteria and virus	Bacteria and virus	Negative	Klebsiella pneumoniae：385 Pseudomonas aeruginosa：193 Human betaherpesvirus 5：25903 Human gammaherpesvirus 4 ：3822 Torque teno virus：444	Pseudomonas aeruginosa：13 Klebsiella pneumoniae：26 Human gammaherpesvirus 4：185 Human betaherpesvirus 5：1210 Torque teno virus：50	only sequencing positive	only sequencing positive	1586724	0.9454	0.9985	0.9522	0.0782	1787923	0.947	0.9835	0.9845	0.0508	3.54	0.98	105.63	17.83	3.96	132.64
S50	Male	72	Negative	18.5	9.16	3.74	110	53	91	4.7	0.078	10.23	14.7	0	Negative	Negative	Negative	Negative	Negative	Negative	both negative	both negative	3011273	0.9466	0.8898	0.9852	0.1149	2921658	0.9482	0.8836	0.9855	0.0808	0.07	too low	76.35	0.93	too low	103.96
S51	Female	37	25	18.5	22.42	4.25	118	330	84.4	8.8	3.68	43.88	51.62	1	Bacteria	Bacteria	Bacteria	Staphylococcus hominis	Staphylococcus haemolyticus：6	Staphylococcus haemolyticus：19	both positive	both positive	2446856	0.9461	0.9254	0.9891	0.0665	2917303	0.9478	0.8795	0.9885	0.0851	0.16	too low	95.26	0.87	too low	100.74
S52	Male	82	Negative	18.5	19.09	1.72	49	52	62	16.1	27.52	5000	214.6	1	Negative	Bacteria and virus	Bacteria and virus	Negative	Klebsiella pneumoniae ：2118 Pseudomonas aeruginosa：56 Bacteroides fragilis：18 Human betaherpesvirus 5：35 Human alphaherpesvirus 1：40 Torque teno virus：6195	Klebsiella pneumoniae：31 Human betaherpesvirus 7：41 Torque teno virus：5761	only sequencing positive	only sequencing positive	2565811	0.9468	0.9967	0.9723	0.0664	2985381	0.9444	0.9937	0.9738	0.065	0.13	0.74	100.32	15.43	7.36	115.23
S53	Female	58	Negative	18.5	11.73	3.82	107	259	94.8	3.8	0.428	14.3	9.05	1	Negative	Virus	Negative	Negative	Human gammaherpesvirus 4：129 Human betaherpesvirus 5：233	Negative	both negative	both negative	1967902	0.9471	0.962	0.9874	0.0525	2951834	0.9454	0.7582	0.9865	0.0654	0.09	too low	130.25	2.63	too low	127.64
S54	Female	34	Negative	18.5	3.85	4.22	116	244	53.8	30.7	0.03	5.7	0.24	0	Negative	Negative	Negative	Negative	Negative	Negative	both negative	both negative	601863	0.9581	0.9384	0.9799	0.1157	667093	0.9577	0.938	0.9779	0.1063	0.64	too low	117.65	4.35	too low	124.62
S55	Male	17	Negative	18.5	4.82	4.61	125	257	64.4	20.7	0.07	13.6	8.35	0	Negative	Negative	Negative	Negative	Negative	Negative	both negative	both negative	2555925	0.9506	0.8948	0.9842	0.0914	2495344	0.9518	0.929	0.9868	0.0745	0.33	too low	103.21	2.35	too low	105.23
S56	Female	38	Negative	18.5	0.32	3.38	94	16	14.3	83	9.15	5000	240.63	1	Negative	Negative	Negative	Negative	Negative	Negative	both negative	both negative	2041452	0.9412	0.8347	0.9884	0.1099	2116795	0.9148	0.9058	0.993	0.1056	1.08	too low	87.52	7.63	too low	105.62
S57	Female	41	Negative	18.1	10.58	2.36	68	50	90	4.7	20.31	164.77	77.2	1	Negative	Bacteria and virus	Bacteria and virus	Negative	Acinetobacter baumannii：635 Enterococcus faecium：58 Human betaherpesvirus 5：38 Human gammaherpesvirus 4：27 Clonorchis sinensis：5 Torque teno virus：199	Acinetobacter baumannii：443 Enterococcus faecium：49 Human gammaherpesvirus 4：12 Human betaherpesvirus 5：6 Clonorchis sinensis：1 Torque teno virus：313	only sequencing positive	only sequencing positive	1641370	0.931	0.9855	0.9868	0.0971	1609699	0.9212	0.9781	0.9899	0.1022	0.64	too low	74.63	18.35	too low	83.65
S58	Male	69	31	18.1	1.45	3.02	102	60	97.2	2.1	100	5000	82.9	1	Bacteria and fungus	Bacteria and virus	Bacteria and virus	Klebsiella pneumoniae Enterococcus faecalis Candida famata	Klebsiella pneumoniae：3133 Human betaherpesvirus 5：148 Human gammaherpesvirus 4：106 Torque teno virus：128	Klebsiella pneumoniae：3641 Human betaherpesvirus 5：164 Human gammaherpesvirus 4:131 Torque teno virus：60	both positive	both positive	5000000	0.9569	0.9913	0.9833	0.0922	647707	0.9339	0.9853	0.9794	0.1246	0.57	too low	74.63	2.36	too low	93.63
S59	Female	93	Negative	18.1	21.24	3.07	88	158	86.3	6.8	4.88	52.2	10.57	1	Negative	Virus	Virus	Negative	Human gammaherpesvirus 4：287 Human alphaherpesvirus 1：189 Human betaherpesvirus 5：101	Human gammaherpesvirus 4：161 Human alphaherpesvirus 1：152 Human betaherpesvirus 5：50	both negative	both negative	3847838	0.9581	0.9769	0.9901	0.0865	589945	0.9341	0.8721	0.9855	0.1385	0.45	too low	87.63	3.65	too low	105.32
S60	Male	66	78	18.1	15.35	3.07	84	89	93.7	2.8	2.48	508.53	80.8	1	Bacteria	Virus	Virus	Staphylococcus hominis	Human betaherpesvirus 5：77 Torque teno virus：16	Torque teno virus：164	only blood culture positive	only blood culture positive	4719744	0.9547	0.9417	0.9899	0.0819	1147291	0.9353	0.9062	0.9787	0.1064	0.27	too low	74.46	4.35	too low	93.64
S61	Female	63	Negative	18.1	2.72	3.92	117	137	69.6	18.3	7.36	7.93	132.2	1	Negative	Virus	Virus	Negative	Dengue virus 1：551675	Dengue virus 1：586965	both negative	both negative	3636680	0.9504	1	0.2545	0.0776	3502669	0.9366	1	0.2025	0.0855	0.75	0.23	87.65	10.35	3.74	96.35
S62	Female	60	19.25	18.1	5.48	2.49	76	28	17	5.8	13.65	5000	263.08	1	Bacteria	Bacteria and virus	Bacteria and virus	Klebsiella pneumoniae	Klebsiella pneumoniae：4126 Human gammaherpesvirus 4：48	Klebsiella pneumoniae：8409 Human gammaherpesvirus 4：65	both positive	both positive	626969	0.9556	0.9895	0.9846	0.0762	560226	0.9326	0.9864	0.9718	0.1246	0.67	too low	98.63	2.31	too low	112.65
S63	Male	21	Negative	18.1	9.95	5.39	149	318	73.8	17	0.08	16.7	6	0	Negative	Virus	Virus	Negative	Torque teno virus：160	Torque teno virus：42	both negative	both negative	1701592	0.944	0.8978	0.9822	0.1036	1819784	0.948	0.9111	0.9875	0.0555	0.35	too low	74.26	3.58	too low	75.42
S64	Male	82	26	18.1	25.63	2.24	57	26	95.1	3.9	271.85	5000	95.4	1	Bacteria	Bacteria and virus	Bacteria and virus	Klebsiella pneumoniae Enterococcus faecium	Klebsiella pneumoniae：403 Human gammaherpesvirus 4：45 Human betaherpesvirus 5：27	Klebsiella pneumoniae：805 Human betaherpesvirus 5：47 Human gammaherpesvirus 4：20	both positive	both positive	2503182	0.9467	0.9641	0.9829	0.103	2670500	0.9452	0.9102	0.9829	0.1146	1.03	too low	89.25	6.25	too low	63.58
S65	Male	82	Negative	18.3	10.89	3.41	113	203	85.5	5.5	1.37	6.2	0.6	1	Negative	Virus	Virus	Negative	Human gammaherpesvirus 4：55	Human gammaherpesvirus 4：11	both negative	both negative	1100032	0.943	0.9147	0.9749	0.0814	1740983	0.9455	0.9229	0.942	0.0902	0.87	too low	62.35	4.69	too low	74.32
S66	Male	15	Negative	18.3	8.16	4.53	132	335	71	11.8	0.37	10.89	73.72	1	Negative	Negative	Negative	Negative	Negative	Negative	both negative	both negative	2027172	0.9314	0.8354	0.9862	0.1059	2081001	0.9349	0.8927	0.9848	0.1137	0.22	too low	87.64	3.68	too low	98.65
S67	Male	82	Negative	18.3	14.29	2.87	92	325	95.8	1.1	3.39	283.07	207.7	1	Negative	Virus	Virus	Negative	Human gammaherpesvirus 4：1884	Human gammaherpesvirus 4：361	both negative	both negative	490589	0.94	0.9959	0.9824	0.099	432522	0.941	0.9309	0.9837	0.0976	1.02	too low	73.46	13.25	too low	84.63
S68	Female	9	Negative	18.3	8.05	3.78	107	259	76.3	16.5	7.7	100.6	48.49	1	Negative	Bacteria	Bacteria	Negative	Mycoplasma pneumoniae：4	Mycoplasma pneumoniae：20	only sequencing positive	only sequencing positive	2628648	0.9382	0.9551	0.9846	0.1066	1960435	0.9387	0.9008	0.9856	0.0979	0.14	too low	79.35	4.62	too low	86.37
S69	Female	43	Negative	18.3	4.98	3.91	122	240	66.7	22.9	3.06	7.59	5.97	1	Negative	Virus	Virus	Negative	Hepatitis B virus：714757	Hepatitis B virus：80405	both negative	both negative	5000000	0.9024	0.9992	0.2578	0.007	1655527	0.9101	0.9916	0.8676	0.0145	0.54	too low	45.53	34.43	8.58	25.46
S70	Male	65	Negative	18.3	7.79	4.81	143	220	57.5	31.5	3.42	7.37	56.3	0	Negative	Virus	Virus	Negative	Human gammaherpesvirus 4：138	Human gammaherpesvirus 4：55	both negative	both negative	2249643	0.9063	0.9312	0.9683	0.014	1802297	0.9135	0.9325	0.9637	0.0194	0.26	too low	100.53	1.68	too low	45.75
S71	Female	54	Negative	18.3	12.41	3.37	101	162	81.9	12.8	3.24	25.59	28.66	1	Negative	Virus	Virus	Negative	Human alphaherpesvirus 1：1738	Human alphaherpesvirus 1：962	both negative	both negative	2509822	0.9031	0.9827	0.9658	0.0322	2302660	0.9144	0.9558	0.9729	0.0239	0.34	too low	100.42	6.25	too low	70.35
S72	Female	59	Negative	18.3	9.67	4.02	122	431	79.4	13.8	2.03	13.6	47	1	Negative	Virus	Negative	Negative	Human gammaherpesvirus 4：11 Human betaherpesvirus 5：23	Negative	both negative	both negative	1495248	0.905	0.9364	0.9606	0.0234	1839072	0.9105	0.9299	0.962	0.023	1.32	too low	108.37	6.63	too low	90.63
S73	Female	24	Negative	18.4	8.86	4.95	142	362	74.6	20.6	4.7	15.4	6.4	1	Negative	Fungus and virus	Virus	Negative	Candida parapsilosis：40 Human gammaherpesvirus 4：27	Human mastadenovirus C 67 Human gammaherpesvirus 4 25	only sequencing positive	both negative	2226017	0.9353	0.9649	0.9715	0.0452	2260143	0.9735	0.9526	0.9726	0.0741	0.65	too low	69.66	7.45	too low	92.58
S74	Male	60	29	18.4	10.21	5.11	137	265	77.1	13.7	0.05	180.4	194	1	Bacteria	Negative	Negative	Granulicatella adiacens	Negative	Negative	only blood culture positive	only blood culture positive	3978553	0.9424	0.9578	0.9744	0.0369	2337956	0.9731	0.9634	0.9815	0.0866	0.23	too low	49.23	3.62	too low	52.49
S75	Male	82	Negative	18.4	4.42	4.94	146	239	84.3	14.3	0.64	10.2	6.7	0	Negative	Negative	Negative	Negative	Negative	Negative	both negative	both negative	2748982	0.9415	0.9692	0.9787	0.0768	2462246	0.9737	0.9528	0.9786	0.0702	0.04	too low	74.24	4.32	too low	28.29
S76	Male	21	Negative	18.4	6.33	4.74	145	242	56.1	34	0.03	3.7	0.06	1	Negative	Negative	Virus	Negative	Negative	Human betaherpesvirus 7：40	both negative	both negative	2758929	0.9417	0.9602	0.9758	0.0608	2466375	0.97	0.9381	0.9604	0.0826	too low	too low	68.63	1.58	too low	24.64
S77	Male	60	Negative	18.4	8.26	4.95	133	293	74.8	14.9	3.6	47.07	120.04	1	Negative	Virus	Virus	Negative	Human polyomavirus：28 Human gammaherpesvirus 4：114	Human polyomavirus：53 Human gammaherpesvirus 4：70	both negative	both negative	3556278	0.9431	0.9584	0.9849	0.0876	3346814	0.9452	0.9592	0.9835	0.0875	0.25	too low	79.26	6.42	too low	59.67
S78	Male	75	Negative	18.4	5.32	4.44	118	452	61.6	22.1	1.08	14.92	23.5	1	Negative	Virus	Virus	Negative	Human gammaherpesvirus 4：4 Human betaherpesvirus 5：26	Human betaherpesvirus 5：4 Human gammaherpesvirus 4：11	both negative	both negative	2672271	0.9406	0.9475	0.9814	0.0641	3332058	0.9431	0.9525	0.982	0.0744	0.16	too low	75.88	3.64	too low	67.48
S79	Female	49	Negative	18.4	9.72	4.31	129	225	74.1	17.8	1.28	13.2	15.4	0	Negative	Virus	Fungus	Negative	Human betaherpesvirus 6：17	Aspergillus flavus：6 Human betaherpesvirus 5：5	both negative	only sequencing positive	3436737	0.9415	0.9568	0.9787	0.0684	3989892	0.9429	0.9341	0.9806	0.09	0.03	0.13	44.43	4.02	1.02	72.36
S80	Female	72	Negative	18.4	4.96	3.95	127	146	64.9	26.7	3.76	50.7	103.2	0	Negative	Virus	Negative	Negative	Human gammaherpesvirus 4：84 Human polyomavirus：42 Human betaherpesvirus 5：70	Negative	both negative	both negative	703364	0.9323	0.8945	0.9725	0.1029	1178771	0.9334	0.8221	0.9783	0.122	0.13	too low	91.43	7.48	too low	80.48
S81	Female	14	Negative	18.5	7.07	4.71	113	240	80.9	14.9	3.16	208.9	41.81	1	Negative	Virus	Virus	Negative	Human gammaherpesvirus 4：86	Human gammaherpesvirus 4：14	both negative	both negative	981693	0.9342	0.8987	0.9798	0.0991	1311958	0.9336	0.9107	0.9805	0.1199	0.22	too low	92.82	5.63	too low	80.26
S82	Female	66	Negative	18.5	6.1	3.99	119	263	50.5	39.9	3.72	120.3	43.6	1	Negative	Virus	Virus	Negative	Human betaherpesvirus 6：705 Human orthopneumovirus：4 Human betaherpesvirus 7：11	Human betaherpesvirus 7：4 Human betaherpesvirus 6：315	both negative	both negative	575932	0.9339	0.9361	0.9641	0.1093	1498976	0.9315	0.8663	0.9704	0.1512	2.43	too low	94.44	7.64	too low	84.26
S83	Female	65	Negative	18.5	4.61	4.61	127	299	30.2	58.4	2.1	60.2	2.3	0	Negative	Virus	Negative	Negative	Human betaherpesvirus 5：54	Negative	both negative	both negative	572590	0.9355	0.9169	0.9546	0.0958	1352784	0.9366	0.8916	0.9824	0.1156	0.12	too low	99.83	5.63	too low	82.23
S84	Female	57	Negative	18.5	8.41	5.57	122	314	61.7	7.2	5.3	87.6	2.9	1	Negative	Fungus and virus	Negative	Negative	Aspergillus fumigatus：21 Pichia kudriavzevii：10 Human betaherpesvirus 5：12 Human gammaherpesvirus 4：14	Negative	only sequencing positive	both negative	443492	0.9322	0.9717	0.9492	0.0948	744137	0.9328	0.8533	0.9778	0.134	0.07	too low	92.23	7.51	too low	120.21
S85	Female	55	Negative	18.5	48.03	1.51	44	19	96.9	1.6	6.72	155.84	156.9	1	Negative	Virus	Virus	Negative	Human betaherpesvirus 5：242 Hepatitis B virus：949	Hepatitis B virus：56 Human betaherpesvirus 5：24	both negative	both negative	2700412	0.9712	0.9954	0.9793	0.0789	2159649	0.9686	0.9103	0.9793	0.103	0.13	too low	74.57	1.97	too low	118.23
S86	Male	23	Negative	18.5	4.23	5.44	155	122	42.8	42.9	0.09	97.4	6.2	0	Negative	Negative	Negative	Negative	Negative	Negative	both negative	both negative	1517745	0.9658	0.9481	0.9592	0.1061	2713977	0.9677	0.8286	0.978	0.1124	0.14	too low	70.23	1.03	too low	88.47
S87	Male	66	Negative	18.5	5.5	3.11	90	322	57.4	19.2	3.07	100.3	54.3	1	Negative	Virus	Virus	Negative	Human betaherpesvirus 5：1641 Human gammaherpesvirus 4：1247	Human betaherpesvirus 5：679 Human gammaherpesvirus 4：368	both negative	both negative	1478918	0.9665	0.9353	0.9535	0.073	2889608	0.9684	0.9224	0.9603	0.0994	0.11	too low	82.65	0.42	too low	47.83
S88	Female	32	Negative	18.5	2.97	4.91	143	223	48.3	43.1	1.02	1.82	16.8	1	Negative	Virus	Virus	Negative	Human gammaherpesvirus 4：62	Human gammaherpesvirus 4：13	both negative	both negative	1564730	0.9666	0.9142	0.9822	0.0775	1950820	0.9664	0.9	0.979	0.1101	too low	too low	139.21	4.55	too low	96.81
S89	Male	66	Negative	18.5	5.36	4.05	133	177	74.4	14.8	2.04	1.62	1.67	0	Negative	Virus	Virus	Negative	Human betaherpesvirus 6：25	Human gammaherpesvirus 4：26	both negative	both negative	3646445	0.9334	0.9801	0.9789	0.0922	3086335	0.9332	0.9472	0.9745	0.1139	0.08	too low	115.15	3.65	too low	115.23
S90	Female	62	Negative	18.4	7.84	4.59	137	274	64.7	24.1	3.35	5.85	16.12	1	Negative	Virus	Virus	Negative	Human betaherpesvirus 5：57 Human gammaherpesvirus 4：119	Human betaherpesvirus 5：34 Human gammaherpesvirus 4：63	both negative	both negative	4115481	0.935	0.9693	0.9834	0.0887	3399291	0.9337	0.9704	0.9787	0.0896	0.12	too low	115.14	11.43	too low	115.67
S91	Female	61	Negative	18.4	6.14	4.25	134	190	59.6	31.9	0.07	84.3	4.8	1	Negative	Virus	Negative	Negative	Human gammaherpesvirus 4：31	Negative	both negative	both negative	3355248	0.9321	0.9766	0.9693	0.0991	3951526	0.9315	0.952	0.9792	0.0964	0.14	too low	58.34	0.39	too low	79.67
S92	Male	75	Negative	18.4	26.71	2.66	54	518	79	13.9	8.17	244.95	94.39	1	Negative	Bacteria and virus	Virus	Negative	Klebsiella pneumoniae：10 Human gammaherpesvirus 4：110	Human gammaherpesvirus 4：16	only sequencing positive	both negative	5000000	0.9302	0.9863	0.9778	0.1117	5000000	0.933	0.9873	0.9737	0.0915	0.43	too low	63.66	3.73	too low	57.25
S93	Male	65	Negative	18.4	6.25	6.65	150	222	42.2	47.6	2.73	76.3	1.46	0	Negative	Negative	Negative	Negative	Negative	Negative	both negative	both negative	3339155	0.9321	0.9829	0.9181	0.0767	4703298	0.9316	0.9556	0.9717	0.1163	0.15	too low	30.63	0.37	too low	81.68
S94	Female	24	Negative	18.4	6.93	2.69	81	111	90.7	7.3	44.04	8.07	22.1	1	Negative	Virus	Virus	Negative	Human betaherpesvirus 5：230 Human gammaherpesvirus 4：16	Human gammaherpesvirus 4：19 Human betaherpesvirus 5：76	both negative	both negative	1784849	0.9388	0.9597	0.9753	0.0974	2243080	0.9411	0.932	0.9818	0.1287	0.05	too low	104.47	1.23	too low	99.29
S95	Male	64	Negative	18.4	11.75	4.94	84	278	75.6	14.8	1.34	7	3.2	1	Negative	Virus	Virus	Negative	Human gammaherpesvirus 4：56	Human gammaherpesvirus 4：23	both negative	both negative	1601220	0.9392	0.9564	0.9755	0.1225	2346927	0.9309	0.9107	0.9695	0.1177	0.12	too low	100.53	5.68	too low	87.28
S96	Male	50	Negative	18.4	15.92	1.91	63	264	94.6	2	3.52	203.2	217.97	1	Negative	Virus	Virus	Negative	Human betaherpesvirus 5：12080	Human betaherpesvirus 5：3972	both negative	both negative	1448252	0.9364	0.9912	0.9603	0.1	2175698	0.9392	0.9739	0.9587	0.1236	0.24	too low	91.83	10.74	too low	65.86
S97	Male	61	Negative	18.4	8.42	4.26	132	273	78.4	7.4	3.16	234.31	147.3	1	Negative	Virus	Negative	Negative	Human betaherpesvirus 5：96 Human gammaherpesvirus 4：305	Negative	both negative	both negative	1836124	0.9364	0.959	0.9767	0.1152	2613989	0.9261	0.8816	0.9649	0.1201	0.13	too low	102.21	11	too low	89.67
S98	Male	72	Negative	18.4	12.58	4.31	131	191	91.5	4.2	7.76	110.2	60.5	1	Negative	Bacteria and virus	Bacteria and virus	Negative	Pseudomonas stutzeri：896 Human alphaherpesvirus 1：308 Human gammaherpesvirus 4：109	Pseudomonas stutzeri：427 Human alphaherpesvirus 1：46	only sequencing positive	only sequencing positive	2078235	0.9277	0.8159	0.9817	0.0328	1815320	0.9247	0.8381	0.9847	0.0293	0.03	too low	96.22	5.58	too low	87.69
